# Supplementary material for: Short Chain Fatty Acid Production from Mycoprotein and Mycoprotein Fibre in an In Vitro Fermentation Model
Source: PubMed Central journal article supplement (PMC6520856; doi:10.3390/nu11040800), 2019-04-08
Supplement: nutrients-11-00800-s001.pdf [file nutrients-11-00800-s001.pdf]

**Supplementary Table 1:** Production of SCFA after 24 hours batch fermentation.

|                   | mmol/l                      |                               |                             |
|-------------------|-----------------------------|-------------------------------|-----------------------------|
|                   | Acetate                     | Propionate                    | Butyrate                    |
| Control           | 6.45 (1.18) <sup>bdf</sup>  | 2.19 (0.11) <sup>cf</sup>     | 2.49 (0.19) <sup>d</sup>    |
| Oligofructose     | 46.47 (4.91) <sup>ade</sup> | 1.28 (0.13) <sup>cf</sup>     | 2.30 (0.64) <sup>d</sup>    |
| Rhamnose          | 22.91 (1.40)                | 23.21 (1.33) <sup>abdef</sup> | 5.02 (0.69) <sup>d</sup>    |
| Laminarin         | 41.02 (4.53) <sup>ae</sup>  | 4.71 (1.64) <sup>cf</sup>     | 18.36 (5.54) <sup>abc</sup> |
| Mycoprotein       | 12.10 (1.57) <sup>bdf</sup> | 6.43 (0.48) <sup>c</sup>      | 6.34 (0.31) <sup>g</sup>    |
| Mycoprotein fibre | 37.62 (10.28) <sup>ae</sup> | 12.25 (2.98) <sup>abcd</sup>  | 11.28 (3.0) <sup>g</sup>    |

Mean (SEM), n = 3. Letters indicate significant difference from corresponding substrate; a – control, b – oligofructose, c – rhamnose, d – laminarin, e – mycoprotein (whole), f – mycoprotein fibre, g – not significantly different from any other substrate
